# Supplementary material for: Improvement in thermostability of an alkaline lipase I from Penicillium cyclopium by directed evolution
Source: Royal Society of Chemistry journal article supplement (doi:10.1039/c7ra06307e), 2017-01-01
Supplement: c7ra06307e1.pdf [file c7ra06307e1.pdf]

**Fig.S1** Michaelis-Menten plots of WT (A) and mutant PCLs, L41P (B), G47I (C), and L41P/G47I (D) using *p*-nitrophenyl caprylate (C8) as substrate at a series of concentrations. Data presented were the average values of three independent experiments and the error bars indicated standard deviations.

**Fig.S2** Michaelis-Menten plots of WT (A) and mutant PCLs, L41P (B), G47I (C), and L41P/G47I (D) using *p*-nitrophenyl laurate (C12) as substrate at a series of concentrations. Data presented were the average values of three independent experiments and the error bars indicated standard deviations.

**Fig.S3** Michaelis-Menten plots of WT (A) and mutant PCLs, L41P (B), G47I (C), and L41P/G47I (D) using *p*-nitrophenyl palmitate (C16) as substrate at a series of concentrations. Data presented were the average values of three independent experiments and the error bars indicated standard deviations.

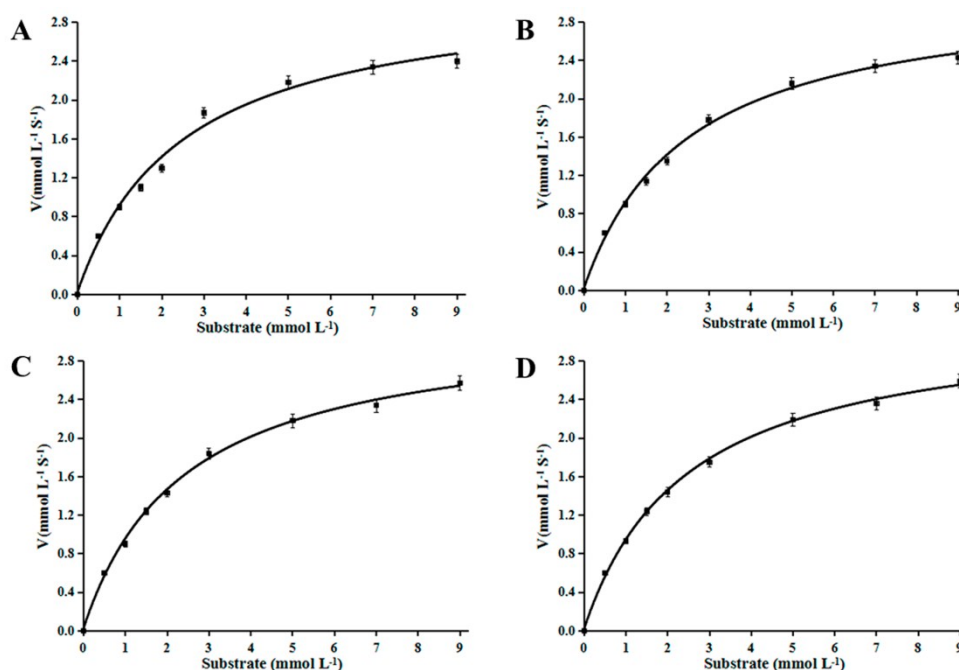

**FIG. S1**

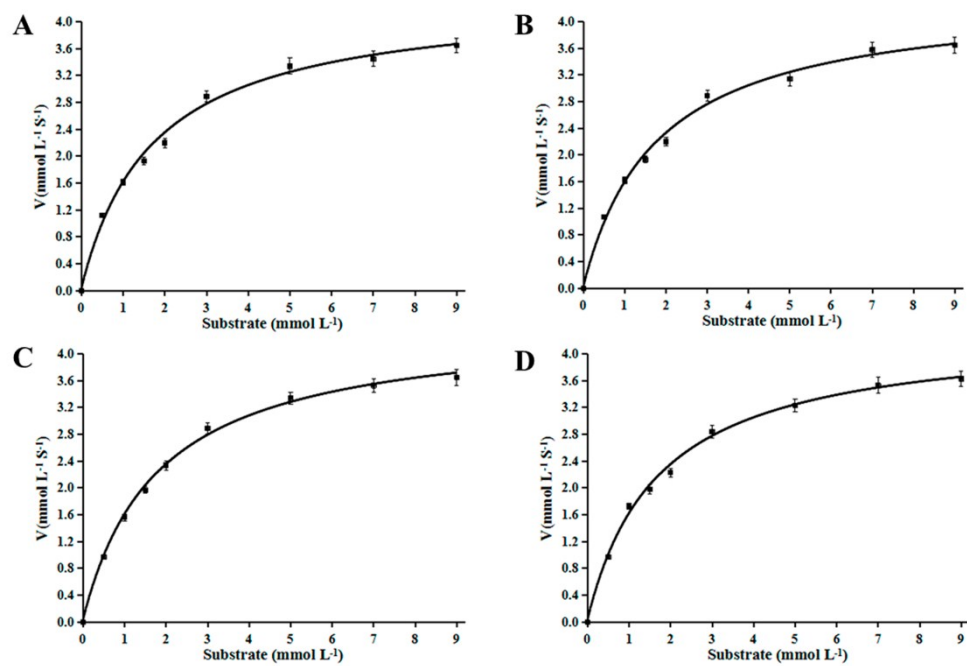

FIG. S2

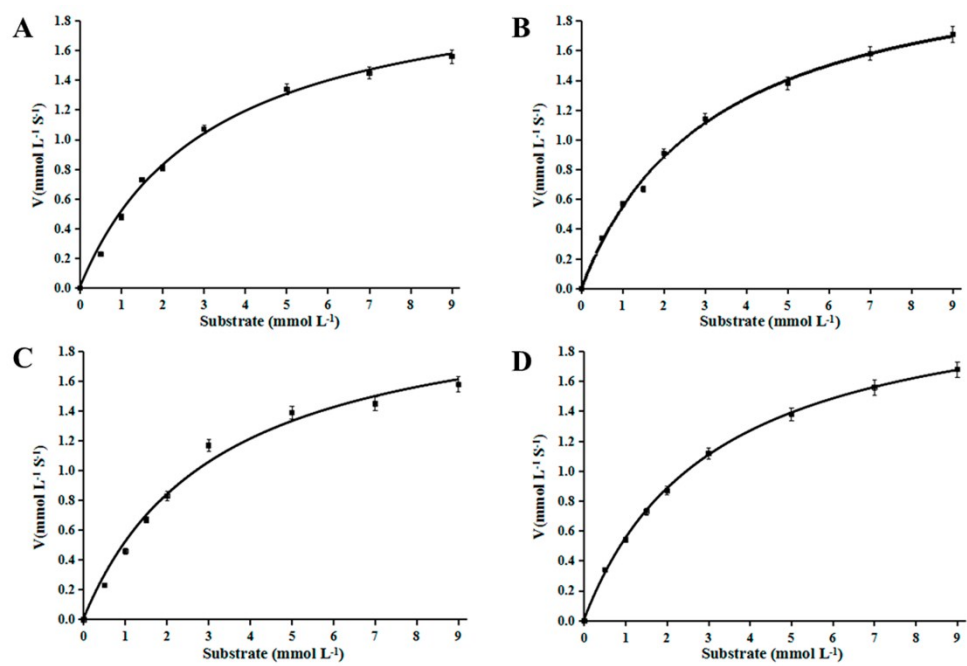

FIG. S3
